# Supplementary material for: Shared component modelling of early childhood anaemia and malaria in Kenya, Malawi, Tanzania and Uganda
Source: Springer Nature journal article supplement (doi:10.1186/s12887-022-03694-4), 2022-11-03
Supplement: MOESM1 [file 23671576]

**Additional File 1: Shared component modelling of early childhood anaemia and malaria in Kenya, Malawi, Tanzania and Uganda**

WinBUGS Child-level SCM Code:

```
model
```

```
{  
  for (i in 1:2){  
    for(j in 1:N){# number of children  
      y[i,j] ~ dbern(p[i,j])  
  
      logit(p[i,j]) <- beta[i,1] + beta[i,2]*Age_Above[i,j] + beta[i,3]*GenderFemale[i,j] +  
beta[i,4]*EduLevel_Prim[i,j] + beta[i,5]*EduLevel_SecHigh[i,j] + beta[i,6]*EduLevel_Unk[i,j] +  
beta[i,7]*ToiletFacPIT[i,j] + beta[i,8]*ToiletFacFlush[i,j] + beta[i,9]*HHGender_Female[i,j] +  
beta[i,10]*TypeResRural[i,j] + beta[i,11]*NumHHMembers[i,j] +  
beta[i,12]*WealthIndexZScore[i,j] + beta[i,13]*ClusterAltitude [i,j] + beta[i,14]*LST [i,j] +  
beta[i,15]*EVI[i,j] + spat[District[i,j],i]  
    }  
  }  
}
```

```
# Spatial effect (decomposed into shared and specific)
```

```
  for (k in 1:369){  
    spat[k,1] <- shared[k]*delta + specific[1,k]  
    spat[k,2] <- shared[k]/delta + specific[2,k]  
  }  
}
```

```
# Shared component:
```

```
  for (k in 1:369){  
    shared[k] <- structshared[k] + unstructshared[k]  
    unstructshared[k] ~dnorm(0,tauinshared)  
  }  
}
```

```
structshared[1:369] ~car.normal(adj[],weights[],num[],taushared)
```

```
# Specific component:
```

```
  for (i in 1:2){  
    for (k in 1:369){  
      specific[i,k] <- struct[i,k] + unstruct[i,k]  
      unstruct[i,k] ~dnorm(0,tauin[i])  
    }  
    struct[i,1:369] ~car.normal(adj[],weights[],num[],tau[i])  
  }  
}
```

```
# Hyperpriors for Precision Parameters:
```

```
  # Precision parameters for shared spatial component
  taushared ~dgamma(1,0.001)
  tauinshared ~dgamma(1,0.001)
```

```
  # Precision parameters for specific spatial component
  for (i in 1:2){
    tau[i] ~dgamma(1,0.001)
    tauin[i] ~dgamma(1,0.001)
  }
```

```
# weights for spatial CAR effect
  for (k in 1:sumNumNeigh){
    weights[k] <-1
  }
```

```
# prior for delta:
  logdelta ~ dnorm(0,5.9)
  delta <- exp(logdelta)
```

```
# vague prior on regression parameters
  for (i in 1:2) {
    for (k in 2:15){
      beta[i,k]~ dnorm(0, 1.0E-04)
    }
  }
```

```
# Flat prior on intercept
  beta[i,1]~ dflat()
}
```

```
# Empirical Variances
  for (i in 1:369){
    anaemia.shared[i] <- shared[i]*delta
    malaria.shared[i] <- shared[i]/delta
  }
```

```
shared.var[1] <- sd(anaemia.shared[])*sd(anaemia.shared[]) # for anaemia
shared.var[2] <- sd(malaria.shared[])*sd(malaria.shared[]) # for anaemia
```

```
specific.var[1] <- sd(specific[1,])*sd(specific[1,]) # for anaemia
specific.var[2] <- sd(specific[2,])*sd(specific[2,]) # for malaria
```

# Proportion of variation in log-likelihood of each disease explained by shared component:

```
prop.shared[1] <- shared.var[1]/(shared.var[1]+specific.var[1]) # for anaemia  
prop.shared[2] <- shared.var[2]/(shared.var[2]+specific.var[2]) # for malaria
```

```
}
```
