# Supplementary material for: Shared component modelling of early childhood anaemia and malaria in Kenya, Malawi, Tanzania and Uganda
Source: Springer Nature journal article supplement (doi:10.1186/s12887-022-03694-4), 2022-11-03
Supplement: MOESM2 [file 23671576]

*Additional file 2: Shared and disease-specific spatial component estimates by district*

| <b>District</b> | <b>Country</b> | <b>Shared Component</b> | <b>Anaemia Shared Component</b> | <b>Malaria Shared Component</b> | <b>Anaemia Specific Component</b> | <b>Malaria Specific Component</b> |
|-----------------|----------------|-------------------------|---------------------------------|---------------------------------|-----------------------------------|-----------------------------------|
| Baringo         | Kenya          | -0.755                  | -0.473                          | -1.205                          | -0.029                            | -0.143                            |
| Bomet           | Kenya          | -0.804                  | -0.504                          | -1.283                          | -0.093                            | -0.090                            |
| Bungoma         | Kenya          | 0.388                   | 0.243                           | 0.619                           | -0.141                            | 1.171                             |
| BusiaK          | Kenya          | 0.206                   | 0.129                           | 0.330                           | -0.441                            | 1.293                             |
| Elgeyo-Marakwet | Kenya          | -0.357                  | -0.223                          | -0.570                          | -0.105                            | 0.290                             |
| Embu            | Kenya          | -1.382                  | -0.866                          | -2.206                          | -0.031                            | -0.808                            |
| Garissa         | Kenya          | -1.652                  | -1.035                          | -2.637                          | 0.033                             | -1.510                            |
| Homa Bay        | Kenya          | 0.225                   | 0.141                           | 0.359                           | -0.223                            | 1.106                             |
| Isiolo          | Kenya          | -1.273                  | -0.797                          | -2.032                          | -0.022                            | -0.878                            |
| Kajiado         | Kenya          | -0.225                  | -0.141                          | -0.359                          | 0.374                             | -0.456                            |
| Kakamega        | Kenya          | 0.553                   | 0.346                           | 0.883                           | 0.105                             | 1.077                             |
| Kericho         | Kenya          | -0.689                  | -0.432                          | -1.100                          | -0.238                            | 0.236                             |
| Kiambu          | Kenya          | -0.867                  | -0.543                          | -1.384                          | -0.207                            | -0.206                            |
| Kilifi          | Kenya          | -1.045                  | -0.655                          | -1.668                          | -0.325                            | -0.131                            |
| Kirinyaga       | Kenya          | -1.526                  | -0.956                          | -2.436                          | -0.162                            | -0.777                            |
| Kisii           | Kenya          | -0.253                  | -0.159                          | -0.404                          | -0.336                            | 0.804                             |
| Kisumu          | Kenya          | 0.332                   | 0.208                           | 0.530                           | -0.131                            | 1.215                             |
| Kitui           | Kenya          | -1.361                  | -0.853                          | -2.173                          | -0.019                            | -0.860                            |
| Kwale           | Kenya          | -0.755                  | -0.473                          | -1.205                          | -0.292                            | -0.083                            |
| Laikipia        | Kenya          | -1.181                  | -0.740                          | -1.885                          | -0.100                            | -0.580                            |
| Lamu            | Kenya          | -1.512                  | -0.947                          | -2.414                          | -0.046                            | -1.259                            |
| Machakos        | Kenya          | -1.282                  | -0.803                          | -2.047                          | -0.120                            | -0.646                            |
| Makueni         | Kenya          | -1.566                  | -0.981                          | -2.500                          | -0.342                            | -0.642                            |
| Mandera         | Kenya          | -0.830                  | -0.520                          | -1.324                          | 0.414                             | -2.352                            |
| Marsabit        | Kenya          | -1.908                  | -1.195                          | -3.046                          | -0.269                            | -0.984                            |
| MeruK           | Kenya          | -1.610                  | -1.009                          | -2.570                          | -0.257                            | -0.862                            |
| Migori          | Kenya          | 0.580                   | 0.363                           | 0.926                           | -0.194                            | 1.217                             |
| Mombasa         | Kenya          | -1.569                  | -0.983                          | -2.505                          | -0.204                            | -0.551                            |
| Murang'a        | Kenya          | -1.337                  | -0.837                          | -2.134                          | -0.151                            | -0.618                            |
| Nairobi         | Kenya          | -1.178                  | -0.738                          | -1.881                          | -0.204                            | -0.459                            |
| Nakuru          | Kenya          | -0.336                  | -0.210                          | -0.536                          | -0.082                            | 0.127                             |

|               |        |        |        |        |        |        |
|---------------|--------|--------|--------|--------|--------|--------|
| Nandi         | Kenya  | -0.601 | -0.376 | -0.959 | -0.278 | 0.477  |
| Narok         | Kenya  | -0.054 | -0.034 | -0.087 | 0.101  | -0.097 |
| Nyamira       | Kenya  | -0.877 | -0.549 | -1.400 | -0.311 | 0.249  |
| Nyandarua     | Kenya  | -0.916 | -0.574 | -1.462 | -0.008 | -0.418 |
| Nyeri         | Kenya  | -1.234 | -0.773 | -1.970 | 0.011  | -0.723 |
| Samburu       | Kenya  | -1.360 | -0.852 | -2.171 | -0.073 | -0.676 |
| Siaya         | Kenya  | 0.565  | 0.354  | 0.903  | -0.288 | 1.651  |
| Taita Taveta  | Kenya  | -1.058 | -0.663 | -1.689 | -0.571 | -0.393 |
| Tana River    | Kenya  | -1.424 | -0.892 | -2.273 | 0.178  | -1.244 |
| Tharaka-Nithi | Kenya  | -1.548 | -0.970 | -2.471 | -0.118 | -0.884 |
| Trans Nzoia   | Kenya  | -0.170 | -0.106 | -0.271 | -0.221 | 0.666  |
| Turkana       | Kenya  | -1.282 | -0.803 | -2.047 | -0.484 | 0.004  |
| Uasin Gishu   | Kenya  | -0.228 | -0.143 | -0.364 | 0.204  | 0.106  |
| Vihiga        | Kenya  | 0.066  | 0.041  | 0.105  | -0.289 | 1.225  |
| Wajir         | Kenya  | -1.757 | -1.101 | -2.805 | -0.083 | -1.584 |
| West Pokot    | Kenya  | 0.031  | 0.020  | 0.050  | 0.108  | 0.524  |
| Balaka        | Malawi | 0.310  | 0.194  | 0.495  | 0.006  | 0.316  |
| Chikwawa      | Malawi | 0.123  | 0.077  | 0.197  | 0.357  | -0.404 |
| Chiradzulu    | Malawi | 0.139  | 0.087  | 0.222  | -0.281 | 0.894  |
| Chitipa       | Malawi | 0.272  | 0.170  | 0.434  | 0.156  | -0.293 |
| Dedza         | Malawi | 0.726  | 0.455  | 1.159  | 0.011  | 0.674  |
| Dowa          | Malawi | 0.664  | 0.416  | 1.060  | -0.236 | 1.045  |
| Karonga       | Malawi | 0.099  | 0.062  | 0.157  | 0.003  | -0.253 |
| Kasungu       | Malawi | 0.855  | 0.536  | 1.365  | -0.024 | 0.874  |
| Machinga      | Malawi | 0.657  | 0.412  | 1.049  | 0.181  | 0.323  |
| Mangochi      | Malawi | 0.675  | 0.423  | 1.078  | 0.033  | 0.561  |
| Mchinji       | Malawi | 0.740  | 0.464  | 1.182  | 0.119  | 0.440  |
| Mulanje       | Malawi | -0.307 | -0.192 | -0.489 | -0.347 | 0.604  |
| Mwanza        | Malawi | 0.320  | 0.200  | 0.510  | -0.242 | 1.008  |
| Nkhata Bay    | Malawi | 0.396  | 0.248  | 0.633  | -0.067 | 0.508  |
| Nkhotakota    | Malawi | 0.667  | 0.417  | 1.064  | 0.088  | 0.542  |
| Nsanje        | Malawi | -0.562 | -0.352 | -0.898 | 0.208  | -1.144 |
| Ntcheu        | Malawi | 0.703  | 0.441  | 1.123  | -0.064 | 0.788  |
| Ntchisi       | Malawi | 0.695  | 0.435  | 1.110  | -0.011 | 0.744  |
| Phalombe      | Malawi | 0.150  | 0.094  | 0.239  | 0.017  | 0.453  |

|              |          |        |        |        |        |        |
|--------------|----------|--------|--------|--------|--------|--------|
| Rumphi       | Malawi   | -0.131 | -0.082 | -0.209 | -0.062 | -0.133 |
| Salima       | Malawi   | 0.548  | 0.343  | 0.875  | 0.105  | 0.407  |
| Thyolo       | Malawi   | -0.062 | -0.039 | -0.099 | -0.152 | 0.273  |
| Zomba        | Malawi   | 0.541  | 0.339  | 0.864  | -0.131 | 0.896  |
| Blantyre     | Malawi   | 0.480  | 0.301  | 0.767  | 0.047  | 0.545  |
| Lilongwe     | Malawi   | 0.809  | 0.507  | 1.291  | 0.021  | 0.731  |
| Mzimba       | Malawi   | 0.506  | 0.317  | 0.808  | -0.044 | 0.606  |
| Ukerewe      | Tanzania | 0.814  | 0.510  | 1.300  | 0.051  | 0.631  |
| Songea DC    | Tanzania | 0.456  | 0.286  | 0.728  | 0.017  | 0.461  |
| Arusha Urban | Tanzania | -0.018 | -0.011 | -0.029 | 0.281  | -1.366 |
| Karatu       | Tanzania | -0.669 | -0.419 | -1.068 | 0.010  | -0.835 |
| Longido      | Tanzania | -0.301 | -0.188 | -0.480 | 0.375  | -1.176 |
| MeruT        | Tanzania | -0.584 | -0.366 | -0.932 | -0.002 | -1.314 |
| Monduli      | Tanzania | -0.712 | -0.446 | -1.137 | -0.088 | -1.046 |
| Ngorongoro   | Tanzania | -0.034 | -0.021 | -0.054 | 0.412  | -0.502 |
| Ilala        | Tanzania | 0.054  | 0.034  | 0.087  | 0.429  | -1.579 |
| Kinondoni    | Tanzania | -0.378 | -0.237 | -0.604 | 0.201  | -1.683 |
| Kigamboni    | Tanzania | -0.229 | -0.143 | -0.365 | 0.097  | -1.225 |
| Bahi         | Tanzania | -0.949 | -0.595 | -1.515 | -0.174 | -0.852 |
| Chamwino     | Tanzania | -0.536 | -0.336 | -0.856 | 0.147  | -1.066 |
| Chemba       | Tanzania | -0.829 | -0.520 | -1.324 | -0.119 | -0.866 |
| Dodoma Urban | Tanzania | -0.433 | -0.271 | -0.692 | 0.271  | -1.281 |
| Kongwa       | Tanzania | -0.433 | -0.271 | -0.690 | 0.128  | -1.185 |
| Mpwapwa      | Tanzania | -0.445 | -0.278 | -0.710 | 0.158  | -1.133 |
| Bukombe      | Tanzania | 0.748  | 0.468  | 1.194  | -0.055 | 0.643  |
| Chato        | Tanzania | 0.741  | 0.464  | 1.184  | -0.082 | 0.731  |
| Geita        | Tanzania | 1.323  | 0.829  | 2.112  | 0.261  | 0.589  |
| Mbogwe       | Tanzania | 0.808  | 0.506  | 1.290  | 0.044  | 0.385  |
| Nyang'wale   | Tanzania | 0.804  | 0.504  | 1.283  | 0.138  | 0.163  |
| Iringa       | Tanzania | -0.473 | -0.297 | -0.756 | 0.066  | -0.971 |
| Iringa Urban | Tanzania | 0.001  | 0.000  | 0.001  | 0.243  | -0.975 |
| Kilolo       | Tanzania | -0.276 | -0.173 | -0.441 | -0.095 | -0.709 |
| Mufindi      | Tanzania | -0.524 | -0.328 | -0.837 | 0.070  | -1.007 |
| Biharamulo   | Tanzania | 0.890  | 0.557  | 1.421  | 0.000  | 0.944  |
| Bukoba       | Tanzania | 0.563  | 0.352  | 0.898  | -0.035 | 0.778  |

|                      |          |        |        |        |        |        |
|----------------------|----------|--------|--------|--------|--------|--------|
| Bukoba Urban         | Tanzania | 0.466  | 0.292  | 0.744  | 0.115  | 0.150  |
| Kyerwa               | Tanzania | 0.821  | 0.514  | 1.311  | 0.104  | 0.912  |
| Missenyi             | Tanzania | 0.472  | 0.295  | 0.753  | -0.062 | 0.856  |
| Muleba               | Tanzania | 0.407  | 0.255  | 0.649  | -0.136 | 0.760  |
| Ngara                | Tanzania | 1.228  | 0.769  | 1.960  | 0.020  | 1.304  |
| Mlele                | Tanzania | 0.829  | 0.519  | 1.323  | 0.203  | 0.253  |
| Mpanda               | Tanzania | 0.154  | 0.096  | 0.245  | -0.160 | 0.155  |
| Mpanda Urban         | Tanzania | -0.094 | -0.059 | -0.150 | -0.054 | -0.047 |
| Buhigwe              | Tanzania | 1.194  | 0.748  | 1.906  | 0.070  | 0.455  |
| Kakonko              | Tanzania | 0.602  | 0.377  | 0.962  | -0.106 | 0.775  |
| Kasulu               | Tanzania | 0.874  | 0.548  | 1.396  | 0.185  | 0.107  |
| Kasulu Township Auth | Tanzania | 0.783  | 0.490  | 1.250  | 0.252  | -0.302 |
| Kibondo              | Tanzania | 0.918  | 0.575  | 1.466  | -0.101 | 0.777  |
| Kigoma Urban         | Tanzania | 0.234  | 0.146  | 0.373  | 0.020  | -0.253 |
| Kigoma               | Tanzania | 1.045  | 0.655  | 1.668  | 0.167  | 0.258  |
| Uvinza               | Tanzania | 0.904  | 0.566  | 1.443  | 0.242  | 0.207  |
| Hai                  | Tanzania | -0.403 | -0.253 | -0.644 | 0.213  | -1.283 |
| Moshi                | Tanzania | -0.633 | -0.397 | -1.011 | 0.118  | -1.173 |
| Moshi Urban          | Tanzania | -0.162 | -0.101 | -0.258 | 0.276  | -1.370 |
| Mwanga               | Tanzania | -0.691 | -0.433 | -1.102 | 0.028  | -1.000 |
| Rombo                | Tanzania | -0.720 | -0.451 | -1.150 | 0.016  | -1.049 |
| Same                 | Tanzania | -0.535 | -0.335 | -0.855 | 0.209  | -1.049 |
| Siha                 | Tanzania | -0.425 | -0.266 | -0.679 | 0.163  | -1.256 |
| Kilwa                | Tanzania | -0.215 | -0.135 | -0.344 | 0.166  | -0.889 |
| Lindi                | Tanzania | -0.032 | -0.020 | -0.050 | 0.030  | -0.621 |
| Lindi Urban          | Tanzania | -0.220 | -0.138 | -0.351 | 0.119  | -0.903 |
| Liwale               | Tanzania | -0.068 | -0.043 | -0.108 | 0.024  | -0.559 |
| Nachingwea           | Tanzania | -0.335 | -0.210 | -0.534 | 0.059  | -0.773 |
| Ruangwa              | Tanzania | -0.240 | -0.151 | -0.384 | 0.053  | -0.713 |
| Babati               | Tanzania | -0.910 | -0.570 | -1.453 | -0.098 | -1.142 |
| Babati Urban         | Tanzania | -0.280 | -0.176 | -0.447 | 0.216  | -1.268 |
| Hanang               | Tanzania | -1.007 | -0.631 | -1.608 | -0.068 | -1.026 |
| Kiteto               | Tanzania | -0.214 | -0.134 | -0.341 | 0.496  | -1.255 |
| Mbulu                | Tanzania | -0.923 | -0.578 | -1.473 | -0.011 | -1.025 |
| Bunda TC             | Tanzania | -0.055 | -0.034 | -0.088 | -0.294 | 0.474  |

|                      |          |        |        |        |        |        |
|----------------------|----------|--------|--------|--------|--------|--------|
| Butiama              | Tanzania | 1.071  | 0.671  | 1.710  | 0.184  | 0.873  |
| Musoma               | Tanzania | 0.105  | 0.066  | 0.167  | -0.024 | 0.263  |
| Musoma Urban         | Tanzania | 0.556  | 0.348  | 0.887  | 0.162  | 0.001  |
| Rorya                | Tanzania | 0.596  | 0.373  | 0.951  | -0.059 | 0.803  |
| Tarime               | Tanzania | 0.629  | 0.394  | 1.004  | 0.216  | 0.495  |
| Chunya               | Tanzania | -0.205 | -0.128 | -0.327 | 0.223  | -0.941 |
| Kyela                | Tanzania | -0.352 | -0.220 | -0.562 | 0.126  | -0.839 |
| Mbarali              | Tanzania | -0.432 | -0.271 | -0.690 | 0.111  | -1.059 |
| Mbeya                | Tanzania | -0.085 | -0.053 | -0.136 | 0.288  | -0.918 |
| Mbeya Urban          | Tanzania | -0.403 | -0.253 | -0.644 | 0.072  | -1.004 |
| Mbozi                | Tanzania | -0.338 | -0.212 | -0.540 | 0.177  | -1.114 |
| Momba                | Tanzania | -0.428 | -0.268 | -0.683 | 0.147  | -1.139 |
| Rungwe               | Tanzania | -0.409 | -0.256 | -0.653 | 0.004  | -0.847 |
| Gairo                | Tanzania | -0.312 | -0.195 | -0.498 | 0.188  | -1.041 |
| Kilombero            | Tanzania | 0.183  | 0.114  | 0.291  | 0.343  | -0.707 |
| Kilosa               | Tanzania | 0.157  | 0.098  | 0.250  | 0.048  | -0.452 |
| Morogoro             | Tanzania | 0.374  | 0.234  | 0.597  | 0.209  | -0.530 |
| Morogoro Urban       | Tanzania | 0.002  | 0.001  | 0.004  | 0.149  | -0.759 |
| Mvomero              | Tanzania | 0.064  | 0.040  | 0.102  | -0.042 | -0.438 |
| Ulanga               | Tanzania | 0.979  | 0.613  | 1.564  | 0.351  | -0.101 |
| Masasi               | Tanzania | -0.404 | -0.253 | -0.644 | -0.060 | -0.615 |
| Masasi Township Auth | Tanzania | -0.019 | -0.012 | -0.030 | -0.054 | -0.124 |
| Mtwara DC            | Tanzania | -0.018 | -0.011 | -0.029 | 0.316  | -1.384 |
| Mtwara Urban         | Tanzania | 0.153  | 0.096  | 0.245  | 0.245  | -1.371 |
| Nanyumbu             | Tanzania | -0.419 | -0.262 | -0.668 | 0.034  | -0.732 |
| Newala DC            | Tanzania | -0.479 | -0.300 | -0.765 | -0.069 | -0.628 |
| Tandahimba           | Tanzania | 0.235  | 0.147  | 0.375  | -0.042 | -0.166 |
| Ilemela              | Tanzania | 0.435  | 0.272  | 0.694  | 0.171  | -0.340 |
| Kwimba               | Tanzania | 0.658  | 0.412  | 1.051  | 0.252  | -0.178 |
| Magu                 | Tanzania | 0.730  | 0.457  | 1.166  | 0.416  | -0.110 |
| Misungwi             | Tanzania | 0.687  | 0.430  | 1.097  | 0.114  | 0.039  |
| Nyamagana            | Tanzania | 0.737  | 0.461  | 1.176  | -0.067 | 0.382  |
| Sengerema DC         | Tanzania | 0.140  | 0.088  | 0.224  | -0.067 | -0.085 |
| Ludewa               | Tanzania | -0.637 | -0.399 | -1.017 | -0.131 | -0.469 |

|                         |          |        |        |        |        |        |
|-------------------------|----------|--------|--------|--------|--------|--------|
| Makambako Township Auth | Tanzania | -0.664 | -0.416 | -1.061 | 0.049  | -1.080 |
| Makete                  | Tanzania | -0.169 | -0.106 | -0.270 | 0.254  | -0.851 |
| Njombe                  | Tanzania | -0.748 | -0.468 | -1.194 | -0.073 | -0.985 |
| Njombe Urban            | Tanzania | -0.754 | -0.472 | -1.204 | -0.073 | -0.865 |
| Wanging'ombe            | Tanzania | -0.493 | -0.309 | -0.787 | 0.183  | -1.069 |
| Chalinze                | Tanzania | -0.550 | -0.344 | -0.877 | 0.179  | -1.285 |
| Kibaha                  | Tanzania | 0.133  | 0.083  | 0.212  | 0.133  | -0.811 |
| Kibaha Urban            | Tanzania | -0.131 | -0.082 | -0.208 | 0.071  | -1.111 |
| Kisarawe                | Tanzania | 0.327  | 0.205  | 0.522  | 0.394  | -0.997 |
| Mkuranga                | Tanzania | 0.050  | 0.032  | 0.081  | 0.016  | -0.924 |
| Rufiji                  | Tanzania | -0.124 | -0.078 | -0.198 | -0.176 | -0.548 |
| Kalambo                 | Tanzania | -0.247 | -0.155 | -0.394 | 0.224  | -1.067 |
| Nkasi                   | Tanzania | 0.461  | 0.288  | 0.735  | 0.032  | 0.026  |
| Sumbawanga              | Tanzania | -0.582 | -0.364 | -0.929 | 0.065  | -1.087 |
| Sumbawanga Urban        | Tanzania | -0.071 | -0.044 | -0.113 | 0.243  | -0.960 |
| Mbinga                  | Tanzania | 0.129  | 0.081  | 0.206  | -0.289 | 0.656  |
| Namtumbo                | Tanzania | 0.637  | 0.399  | 1.017  | 0.010  | 0.255  |
| Nyasa                   | Tanzania | -0.603 | -0.378 | -0.962 | -0.243 | -0.050 |
| Tunduru                 | Tanzania | 0.795  | 0.498  | 1.270  | 0.239  | 0.054  |
| Msalala                 | Tanzania | 0.841  | 0.527  | 1.342  | 0.316  | -0.056 |
| Kahama TC               | Tanzania | 0.831  | 0.520  | 1.326  | 0.257  | -0.019 |
| Kishapu                 | Tanzania | 0.058  | 0.036  | 0.092  | 0.245  | -0.623 |
| Shinyanga               | Tanzania | 0.226  | 0.141  | 0.360  | 0.196  | -0.504 |
| Shinyanga Urban         | Tanzania | 0.181  | 0.113  | 0.288  | 0.210  | -0.807 |
| Bariadi DC              | Tanzania | 0.651  | 0.408  | 1.040  | -0.031 | 0.631  |
| Busega                  | Tanzania | 0.147  | 0.092  | 0.234  | 0.023  | 0.036  |
| Itilima                 | Tanzania | 0.371  | 0.232  | 0.592  | 0.304  | -0.176 |
| Maswa                   | Tanzania | 0.338  | 0.212  | 0.539  | -0.059 | 0.054  |
| Meatu                   | Tanzania | -0.214 | -0.134 | -0.341 | -0.353 | -0.002 |
| Ikungi                  | Tanzania | -0.949 | -0.595 | -1.515 | -0.271 | -0.660 |
| Iramba                  | Tanzania | -0.707 | -0.443 | -1.129 | -0.052 | -0.732 |
| Mkalama                 | Tanzania | -0.874 | -0.547 | -1.395 | -0.078 | -0.790 |
| Singida                 | Tanzania | -0.872 | -0.546 | -1.392 | 0.108  | -0.956 |
| Singida Urban           | Tanzania | -1.198 | -0.750 | -1.913 | -0.078 | -0.868 |

|                       |          |        |        |        |        |        |
|-----------------------|----------|--------|--------|--------|--------|--------|
| Igunga                | Tanzania | -0.224 | -0.140 | -0.357 | 0.237  | -0.793 |
| Kaliua                | Tanzania | 1.002  | 0.628  | 1.600  | 0.196  | 0.463  |
| Sikonge               | Tanzania | 0.103  | 0.064  | 0.164  | -0.196 | 0.075  |
| Tabora Urban          | Tanzania | 0.053  | 0.033  | 0.085  | 0.061  | -0.298 |
| Urambo                | Tanzania | 0.421  | 0.263  | 0.671  | -0.008 | 0.205  |
| Uyui                  | Tanzania | 0.187  | 0.117  | 0.299  | -0.052 | -0.009 |
| Handeni               | Tanzania | -0.668 | -0.419 | -1.067 | 0.032  | -1.125 |
| Handeni Mjini         | Tanzania | -0.809 | -0.507 | -1.291 | -0.052 | -0.883 |
| Kilindi               | Tanzania | -0.163 | -0.102 | -0.261 | -0.135 | -0.515 |
| Korogwe               | Tanzania | -0.542 | -0.340 | -0.866 | 0.189  | -1.150 |
| Korogwe Township Auth | Tanzania | -1.039 | -0.651 | -1.659 | 0.038  | -1.439 |
| Lushoto               | Tanzania | -0.873 | -0.547 | -1.394 | -0.006 | -1.008 |
| Mkinga                | Tanzania | -1.096 | -0.687 | -1.750 | -0.041 | -1.247 |
| Muheza                | Tanzania | -0.810 | -0.507 | -1.293 | 0.188  | -1.474 |
| Pangani               | Tanzania | -0.970 | -0.607 | -1.548 | 0.016  | -1.434 |
| Tanga Urban           | Tanzania | -0.874 | -0.548 | -1.395 | 0.218  | -1.702 |
| Arusha                | Tanzania | -0.324 | -0.203 | -0.517 | 0.242  | -1.314 |
| Nsimbo                | Tanzania | 0.207  | 0.130  | 0.331  | -0.058 | 0.067  |
| Busokelo              | Tanzania | 0.128  | 0.080  | 0.205  | 0.085  | -0.473 |
| Bumbuli               | Tanzania | -0.881 | -0.552 | -1.406 | 0.087  | -1.325 |
| Serengeti             | Tanzania | 0.312  | 0.195  | 0.498  | -0.230 | 0.707  |
| Simanjiro             | Tanzania | -0.332 | -0.208 | -0.530 | 0.481  | -1.240 |
| Tarime TC             | Tanzania | 0.162  | 0.101  | 0.258  | 0.072  | 0.034  |
| Bunda DC              | Tanzania | 0.009  | 0.006  | 0.014  | -0.268 | 0.552  |
| Bariadi TC            | Tanzania | -0.457 | -0.286 | -0.729 | -0.288 | 0.130  |
| Geita Town            | Tanzania | 0.002  | 0.001  | 0.003  | -0.154 | -0.008 |
| Manyoni               | Tanzania | 0.236  | 0.148  | 0.377  | -0.204 | 0.287  |
| Ubungo MC             | Tanzania | -0.149 | -0.093 | -0.237 | 0.259  | -1.529 |
| Temeke                | Tanzania | 0.407  | 0.255  | 0.649  | 0.356  | -1.149 |
| Newala TC             | Tanzania | 0.324  | 0.203  | 0.517  | 0.160  | -0.218 |
| Nanyamba TC           | Tanzania | -0.237 | -0.148 | -0.378 | 0.301  | -1.346 |
| Ifakara               | Tanzania | -0.099 | -0.062 | -0.159 | 0.066  | -0.739 |
| Mafinga Township Auth | Tanzania | -0.692 | -0.434 | -1.105 | 0.035  | -1.019 |
| Mbinga TC             | Tanzania | 0.400  | 0.251  | 0.639  | 0.210  | 0.212  |
| Mbulu TC              | Tanzania | -0.589 | -0.369 | -0.941 | 0.160  | -1.049 |

|              |          |        |        |        |        |        |
|--------------|----------|--------|--------|--------|--------|--------|
| Songwe       | Tanzania | -0.220 | -0.138 | -0.351 | 0.083  | -0.750 |
| Mpimbwe      | Tanzania | -0.740 | -0.464 | -1.182 | -0.049 | -0.948 |
| Karagwe      | Tanzania | -0.017 | -0.011 | -0.027 | -0.284 | 0.602  |
| Ileje        | Tanzania | -0.180 | -0.113 | -0.288 | 0.130  | -0.822 |
| Kibiti       | Tanzania | -0.140 | -0.088 | -0.223 | 0.195  | -1.152 |
| Ushetu       | Tanzania | 1.037  | 0.650  | 1.655  | 0.207  | 0.404  |
| Buchosa DC   | Tanzania | 0.624  | 0.391  | 0.997  | 0.148  | -0.027 |
| Kondoa       | Tanzania | -0.668 | -0.418 | -1.066 | 0.139  | -1.195 |
| Nzega        | Tanzania | 0.201  | 0.126  | 0.320  | -0.112 | -0.078 |
| Abim         | Uganda   | 0.773  | 0.484  | 1.234  | -0.234 | 1.467  |
| Adjumani     | Uganda   | -0.598 | -0.374 | -0.954 | -0.295 | -0.171 |
| Agago        | Uganda   | 0.881  | 0.552  | 1.407  | 0.197  | 0.933  |
| Alebtong     | Uganda   | 1.067  | 0.668  | 1.703  | -0.009 | 1.288  |
| Amolatar     | Uganda   | 0.665  | 0.416  | 1.061  | -0.149 | 0.885  |
| Amudat       | Uganda   | 0.288  | 0.181  | 0.460  | -0.275 | 1.259  |
| Amuria       | Uganda   | 1.204  | 0.754  | 1.922  | 0.137  | 1.342  |
| Amuru        | Uganda   | 0.950  | 0.595  | 1.517  | 0.367  | 0.417  |
| Apac         | Uganda   | 1.410  | 0.883  | 2.251  | 0.362  | 0.959  |
| Arua         | Uganda   | 0.181  | 0.113  | 0.289  | 0.103  | -0.163 |
| Budaka       | Uganda   | 0.330  | 0.207  | 0.527  | -0.165 | 1.155  |
| Bududa       | Uganda   | -0.287 | -0.180 | -0.459 | -0.202 | 0.678  |
| Bugiri       | Uganda   | 0.348  | 0.218  | 0.555  | -0.171 | 0.937  |
| Buhweju      | Uganda   | -0.579 | -0.363 | -0.924 | -0.048 | 0.648  |
| Buikwe       | Uganda   | 0.828  | 0.519  | 1.322  | 0.115  | 0.668  |
| Bukedea      | Uganda   | 0.376  | 0.236  | 0.601  | -0.277 | 1.333  |
| Bukomansimbi | Uganda   | 0.701  | 0.439  | 1.119  | 0.102  | 0.729  |
| Bukwo        | Uganda   | 0.256  | 0.160  | 0.409  | -0.036 | 0.902  |
| Bulambuli    | Uganda   | -0.038 | -0.024 | -0.061 | -0.094 | 0.755  |
| Buliisa      | Uganda   | 0.660  | 0.414  | 1.054  | 0.024  | 0.576  |
| Bundibugyo   | Uganda   | 0.139  | 0.087  | 0.221  | 0.244  | 0.286  |
| Bushenyi     | Uganda   | -0.731 | -0.458 | -1.167 | -0.470 | 1.078  |
| BusiaU       | Uganda   | 1.083  | 0.678  | 1.729  | 0.011  | 1.432  |
| Butaleja     | Uganda   | -0.326 | -0.204 | -0.521 | -0.221 | 0.537  |
| Butambala    | Uganda   | -0.026 | -0.016 | -0.042 | 0.023  | -0.102 |
| Buvuma       | Uganda   | 0.970  | 0.608  | 1.549  | -0.046 | 1.095  |



|             |        |        |        |        |        |        |
|-------------|--------|--------|--------|--------|--------|--------|
| Buyende     | Uganda | 1.185  | 0.742  | 1.892  | 0.036  | 1.223  |
| Dokolo      | Uganda | -0.292 | -0.183 | -0.467 | -0.269 | 0.305  |
| Gomba       | Uganda | 0.332  | 0.208  | 0.530  | 0.087  | 0.286  |
| Gulu        | Uganda | 0.939  | 0.588  | 1.499  | 0.033  | 0.882  |
| Hoima       | Uganda | -0.273 | -0.171 | -0.436 | -0.337 | 0.384  |
| Ibanda      | Uganda | 0.036  | 0.023  | 0.057  | 0.040  | 0.863  |
| Iganga      | Uganda | 0.854  | 0.535  | 1.363  | 0.099  | 0.937  |
| Isingiro    | Uganda | 0.048  | 0.030  | 0.077  | 0.170  | 0.473  |
| Jinja       | Uganda | 0.943  | 0.591  | 1.505  | 0.094  | 0.784  |
| Kaabong     | Uganda | 0.838  | 0.525  | 1.337  | -0.144 | 1.634  |
| Kabale      | Uganda | -0.933 | -0.584 | -1.489 | -0.087 | 0.072  |
| Kabarole    | Uganda | -0.434 | -0.272 | -0.693 | -0.169 | 0.268  |
| Kaberamaido | Uganda | 0.238  | 0.149  | 0.381  | 0.115  | 0.426  |
| Kagadi      | Uganda | 0.239  | 0.150  | 0.381  | 0.145  | 0.326  |
| Kakumiro    | Uganda | 0.149  | 0.093  | 0.238  | -0.025 | 0.384  |
| Kalangala   | Uganda | -0.125 | -0.078 | -0.199 | -0.107 | 0.108  |
| Kaliro      | Uganda | 1.325  | 0.830  | 2.115  | 0.279  | 1.195  |
| Kalungu     | Uganda | 0.482  | 0.302  | 0.769  | 0.036  | 0.414  |
| Kampala     | Uganda | 0.495  | 0.310  | 0.790  | 0.163  | 0.015  |
| Kamuli      | Uganda | 1.236  | 0.774  | 1.973  | 0.058  | 1.083  |
| Kamwenge    | Uganda | -0.266 | -0.167 | -0.424 | -0.087 | 0.512  |
| Kanungu     | Uganda | -0.785 | -0.492 | -1.254 | -0.223 | 0.555  |
| Kapchorwa   | Uganda | -0.280 | -0.175 | -0.446 | -0.067 | 0.402  |
| Kasese      | Uganda | -0.324 | -0.203 | -0.517 | -0.412 | 0.895  |
| Katakwi     | Uganda | 1.374  | 0.861  | 2.193  | 0.083  | 1.667  |
| Kayunga     | Uganda | 1.103  | 0.691  | 1.761  | 0.432  | 0.582  |
| Kibaale     | Uganda | 0.244  | 0.153  | 0.389  | 0.053  | 0.346  |
| Kiboga      | Uganda | -0.195 | -0.122 | -0.311 | -0.089 | 0.028  |
| Kibuku      | Uganda | -0.265 | -0.166 | -0.422 | -0.220 | 0.587  |
| Kiruhura    | Uganda | -0.800 | -0.501 | -1.276 | -0.690 | 0.667  |
| Kiryandongo | Uganda | 0.592  | 0.371  | 0.945  | 0.020  | 0.514  |
| Kisoro      | Uganda | -1.128 | -0.707 | -1.801 | -0.173 | 0.159  |
| Kitgum      | Uganda | 0.985  | 0.617  | 1.572  | -0.053 | 1.354  |
| Koboko      | Uganda | -0.403 | -0.253 | -0.644 | 0.033  | -0.894 |
| Kole        | Uganda | 0.876  | 0.549  | 1.399  | 0.166  | 0.605  |

|               |        |        |        |        |        |        |
|---------------|--------|--------|--------|--------|--------|--------|
| Kotido        | Uganda | 1.091  | 0.683  | 1.742  | -0.177 | 1.774  |
| Kumi          | Uganda | 0.566  | 0.354  | 0.903  | -0.200 | 1.361  |
| Kween         | Uganda | -0.225 | -0.141 | -0.358 | -0.206 | 0.704  |
| Kyankwanzi    | Uganda | -0.074 | -0.047 | -0.119 | -0.008 | 0.103  |
| Kyegegwa      | Uganda | 0.252  | 0.158  | 0.402  | 0.042  | 0.543  |
| Kyenjojo      | Uganda | 0.408  | 0.255  | 0.651  | 0.283  | 0.296  |
| Lamwo         | Uganda | 0.654  | 0.410  | 1.045  | -0.143 | 0.949  |
| Lira          | Uganda | 0.743  | 0.465  | 1.186  | -0.281 | 1.167  |
| Luuka         | Uganda | 1.411  | 0.884  | 2.253  | 0.055  | 1.361  |
| Luwero        | Uganda | 0.295  | 0.185  | 0.470  | -0.104 | 0.424  |
| Lwengo        | Uganda | 0.730  | 0.457  | 1.165  | -0.245 | 1.336  |
| Lyantonde     | Uganda | 0.475  | 0.297  | 0.758  | -0.151 | 1.246  |
| Maracha       | Uganda | 0.263  | 0.165  | 0.420  | 0.261  | -0.578 |
| Masaka        | Uganda | 0.121  | 0.076  | 0.194  | -0.047 | 0.356  |
| Masindi       | Uganda | 0.427  | 0.267  | 0.681  | 0.189  | 0.236  |
| Mayuge        | Uganda | 0.911  | 0.571  | 1.454  | -0.226 | 1.315  |
| Mbale         | Uganda | 0.293  | 0.184  | 0.468  | -0.070 | 0.983  |
| Mbarara       | Uganda | -0.650 | -0.407 | -1.037 | -0.459 | 0.889  |
| Mitooma       | Uganda | -0.462 | -0.289 | -0.737 | -0.291 | 1.136  |
| Mityana       | Uganda | -0.052 | -0.032 | -0.083 | 0.103  | -0.138 |
| Moroto        | Uganda | 0.509  | 0.319  | 0.812  | -0.411 | 1.594  |
| Moyo          | Uganda | -0.197 | -0.124 | -0.315 | -0.037 | -0.263 |
| Mpigi         | Uganda | -0.010 | -0.006 | -0.016 | 0.113  | -0.151 |
| Mubende       | Uganda | 0.175  | 0.110  | 0.280  | -0.091 | 0.431  |
| Mukono        | Uganda | 0.324  | 0.203  | 0.518  | -0.101 | 0.399  |
| Nakapiripirit | Uganda | 0.887  | 0.556  | 1.416  | 0.067  | 1.385  |
| Nakaseke      | Uganda | -0.115 | -0.072 | -0.184 | -0.070 | 0.006  |
| Nakasongola   | Uganda | 0.029  | 0.018  | 0.047  | -0.151 | 0.223  |
| Namayingo     | Uganda | 0.819  | 0.513  | 1.308  | 0.234  | 0.921  |
| Namutumba     | Uganda | -0.279 | -0.175 | -0.446 | -0.237 | 0.471  |
| Napak         | Uganda | 1.319  | 0.826  | 2.106  | -0.050 | 1.823  |
| Nebbi         | Uganda | 1.123  | 0.703  | 1.793  | 0.062  | 0.729  |
| Ngora         | Uganda | 0.868  | 0.544  | 1.385  | -0.149 | 1.519  |
| Ntoroko       | Uganda | -0.604 | -0.378 | -0.963 | -0.323 | 0.264  |
| Ntungamo      | Uganda | -0.498 | -0.312 | -0.796 | -0.219 | 0.778  |

|            |        |        |        |        |        |        |
|------------|--------|--------|--------|--------|--------|--------|
| Nwoya      | Uganda | 0.698  | 0.437  | 1.115  | 0.151  | 0.420  |
| Omoro      | Uganda | 0.969  | 0.607  | 1.547  | 0.040  | 0.896  |
| Otuke      | Uganda | 0.323  | 0.202  | 0.515  | -0.285 | 1.004  |
| Oyam       | Uganda | 0.906  | 0.567  | 1.446  | -0.110 | 1.012  |
| Pader      | Uganda | 0.323  | 0.202  | 0.515  | -0.048 | 0.644  |
| Pallisa    | Uganda | 0.075  | 0.047  | 0.120  | -0.306 | 0.930  |
| Kyotera    | Uganda | 0.739  | 0.463  | 1.179  | 0.026  | 0.974  |
| Rubanda    | Uganda | -1.110 | -0.695 | -1.772 | -0.322 | 0.327  |
| Rubirizi   | Uganda | -0.542 | -0.340 | -0.866 | -0.442 | 0.988  |
| Rukungiri  | Uganda | -0.245 | -0.154 | -0.391 | 0.088  | 0.760  |
| Serere     | Uganda | -0.110 | -0.069 | -0.176 | -0.225 | 0.610  |
| Sheema     | Uganda | -0.933 | -0.584 | -1.489 | -0.364 | 0.791  |
| Sironko    | Uganda | -0.422 | -0.265 | -0.674 | -0.233 | 0.608  |
| Soroti     | Uganda | 0.650  | 0.407  | 1.038  | -0.164 | 1.199  |
| Ssembabule | Uganda | 0.030  | 0.019  | 0.048  | 0.020  | 0.422  |
| Tororo     | Uganda | -0.534 | -0.334 | -0.852 | -0.105 | 0.203  |
| Wakiso     | Uganda | 0.457  | 0.286  | 0.729  | 0.152  | 0.218  |
| Yumbe      | Uganda | 0.197  | 0.123  | 0.314  | 0.143  | -0.368 |
| Zombo      | Uganda | 0.858  | 0.538  | 1.370  | 0.111  | 0.406  |
| Pakwach    | Uganda | 0.717  | 0.449  | 1.145  | 0.089  | 0.382  |
| Rakai      | Uganda | 0.497  | 0.311  | 0.793  | -0.095 | 1.104  |
| Rukiga     | Uganda | -0.798 | -0.500 | -1.274 | -0.126 | 0.358  |
| Bunyangabu | Uganda | -0.156 | -0.098 | -0.249 | -0.056 | 0.460  |
| Butebo     | Uganda | -0.084 | -0.053 | -0.134 | -0.201 | 0.856  |
| Manafwa    | Uganda | 0.315  | 0.197  | 0.502  | 0.072  | 0.795  |
